# Supplementary material for: Broccoli Myrosinase cDNA Expression in Escherichia coli and Saccharomyces cerevisiae
Source: MDPI journal article supplement (doi:10.3390/biom12020233), 2022-01-30
Supplement: s1 [file s1]

Supplementary material

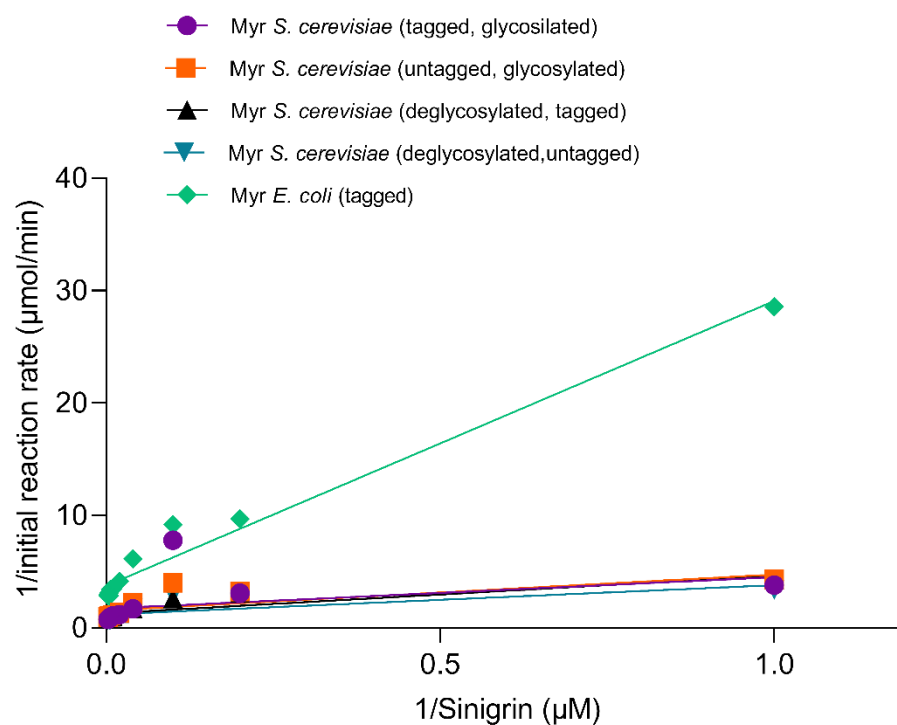

**Figure S1.** Enzymatic activity of myrosinase produced in *S. cerevisiae* MGY70-myr after different treatments, in comparison with myrosinase produced in *E. coli* BLD21(DE3)-myr. The kinetic constants  $K_m$  and  $V_{max}$  were calculated from the Lineweaver-Burk plot, fitting a linear regression for each reciprocal. The assays were performed at 30 °C, in sodium phosphate buffer pH 7. The reaction mixture contained 0.05 mg of protein.
